# Supplementary material
Source: PubMed Central journal article supplement (PMC3648051)
Supplement: AEM.03661-12_zam999104401so1.pdf [file AEM.03661-12_zam999104401so1.pdf]

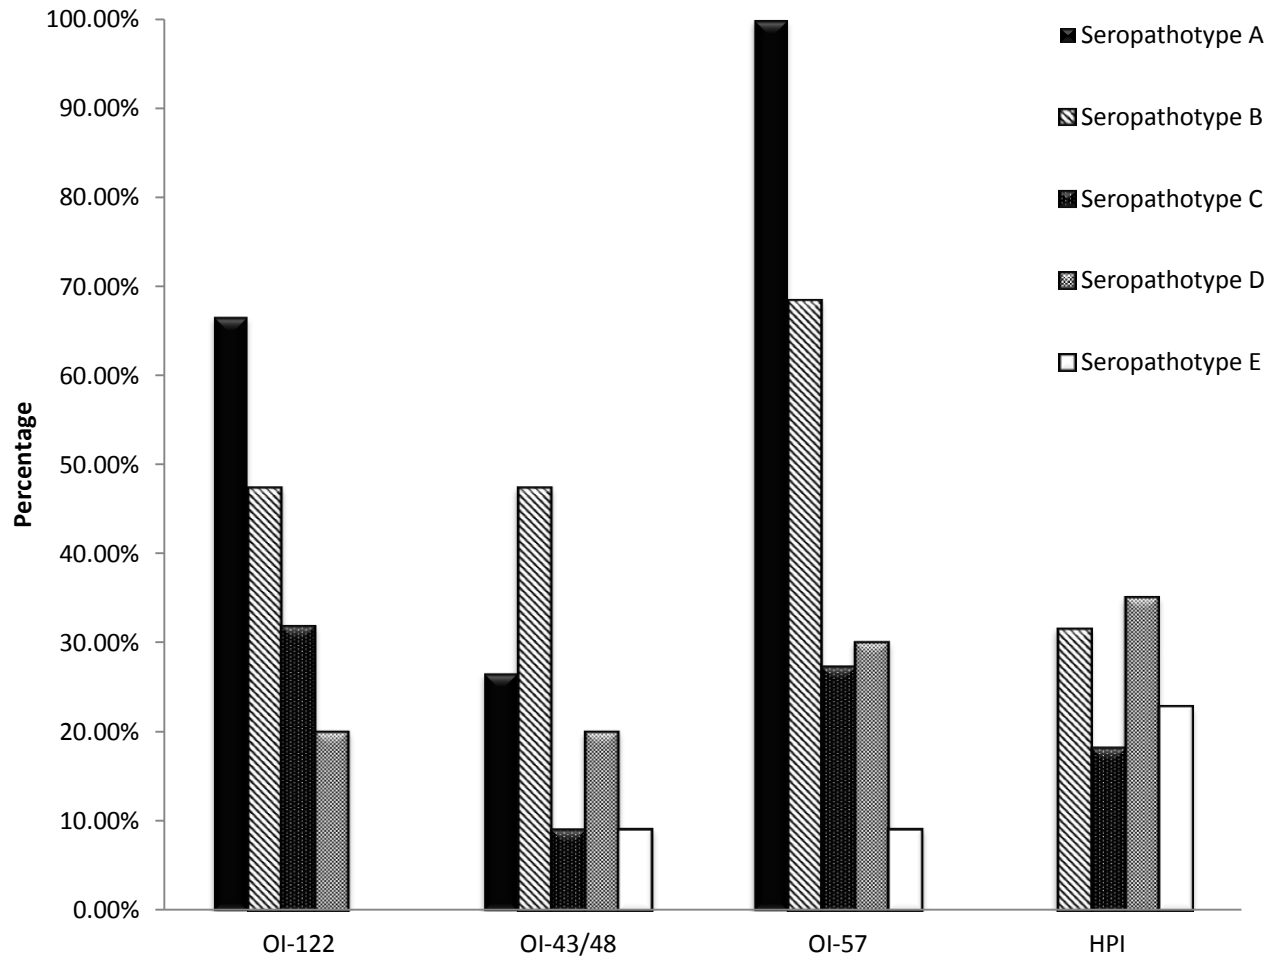

**Figure S1. Distribution of OI-122, OI-43/48, OI-57 and high pathogenicity island (HPI) in STEC strains (n=98) of different seropathotypes.**
